# Supplementary material
Source: PubMed Central journal article supplement (PMC10570918)
Supplement: jama-e2320820-s001.pdf [file jama-e2320820-s001.pdf]

## Supplemental Online Content

Siegal DM, Belley-Cote EP, Lee SF, et al. Small-volume blood collection tubes to reduce transfusions in intensive care: the STRATUS randomized clinical trial. *JAMA*. doi:10.1001/jama.2023.20820

**eFigure 1.** Study Timeline and Randomized Transition Scheme

**eFigure 2.** RBC Units per Patient per ICU Stay Before and After Transition to Small-Volume Tubes at Individual ICUs (Secondary Analysis Population)

**eTable 1.** Blood Collection Tube Volumes Before and After Transition To Small-Volume Tubes at Participating ICUs

**eTable 2.** Cluster Characteristics and Baseline Characteristics of All Patients Admitted to ICU  $\geq 48$  Hours (Secondary Population)

**eTable 3.** Baseline Characteristics of Patients Admitted During the Pandemic-Related Delay and Other Study Periods

**eTable 4.** Selected Baseline Characteristics in Individual ICUs

**eTable 5.** Study Outcomes of All Patients Admitted to ICU  $\geq 48$  Hours (Secondary Population)

**eTable 6.** Study Outcomes Among Patients With Any Duration of ICU Admission (Excluding Patients Admitted During Pandemic-Related Delay)

**eTable 7.** Study Outcomes Among Patients With Any Duration of ICU Admission (Including Patients Admitted During Pandemic-Related Delay)

**eTable 8.** Subgroup Analyses for the Effect of Transition to Small-Volume Tubes on RBC Units Transfused in ICU (Primary Population)

**eTable 9.** Subgroup Analysis for the Effect of Intervention on RBC Units Transfused on ICU (Secondary Population)

**eTable 10.** Sensitivity Analysis of Primary Outcome Adjusted for Imbalanced Baseline Characteristics (Primary Population)

**eTable 11.** Sensitivity Analysis of Primary Outcome Without Adjusting for Age and Sex, and Primary Outcome Model With Time-Decay Correlation

**eTable 12.** Analysis of Primary Outcome Using Prespecified Generalized Linear Mixed Model (GLMM) and Post-Hoc Generalized Estimating Equation Model (GEE)

This supplemental material has been provided by the authors to give readers additional information about their work.

42 **eFigure 1: Study timeline and randomized transition scheme**

43

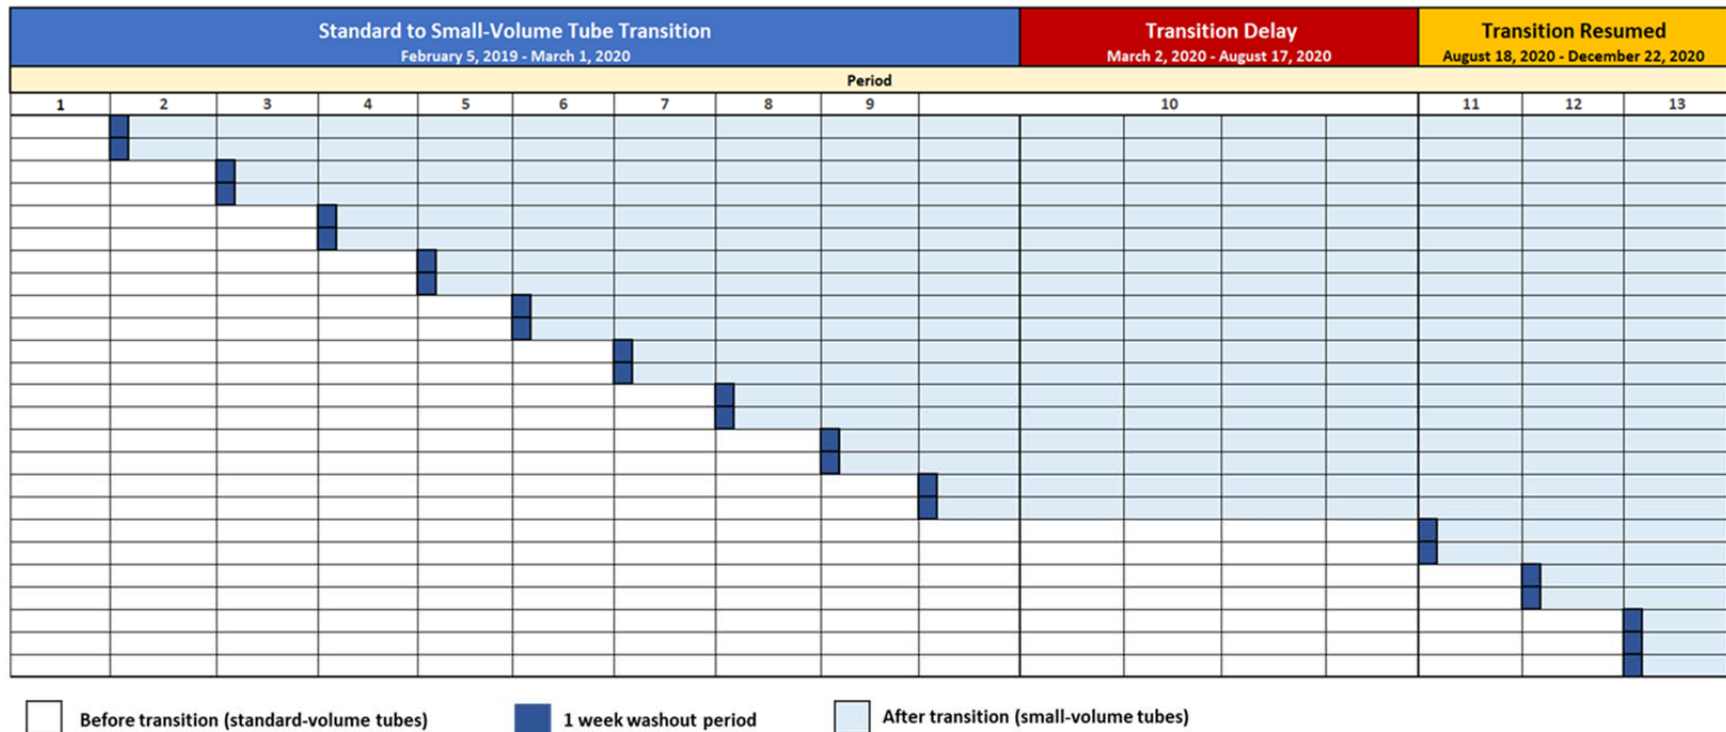

44

45

46 **eFigure 1.** Diagram showing the study timeline and sequence of randomized transitions. After a 6-week baseline period during which sites used standard-  
 47 volume tubes according to routine care, each ICU transitioned randomly from standard-volume tubes (white) to small-volume tubes (light blue) according to a  
 48 concealed randomization schedule. At 6-week intervals, 2 sites switched to the small-volume tubes. Transitions were followed by a 1-week washout period  
 49 (dark blue) during which small-volume tubes were used but data were excluded from analysis. Transitions were paused at 7 sites after the onset of the COVID-  
 50 19 pandemic (“transition delay”) during which time all sites uses the allocated tubes and data collection continued. Transitions resumed after a 5-month delay  
 51 and were completed by all sites.

52 **eFigure 2: RBC units per patient per ICU stay before and after transition to small-volume**  
 53 **tubes at individual ICUs (secondary analysis population)**  
 54

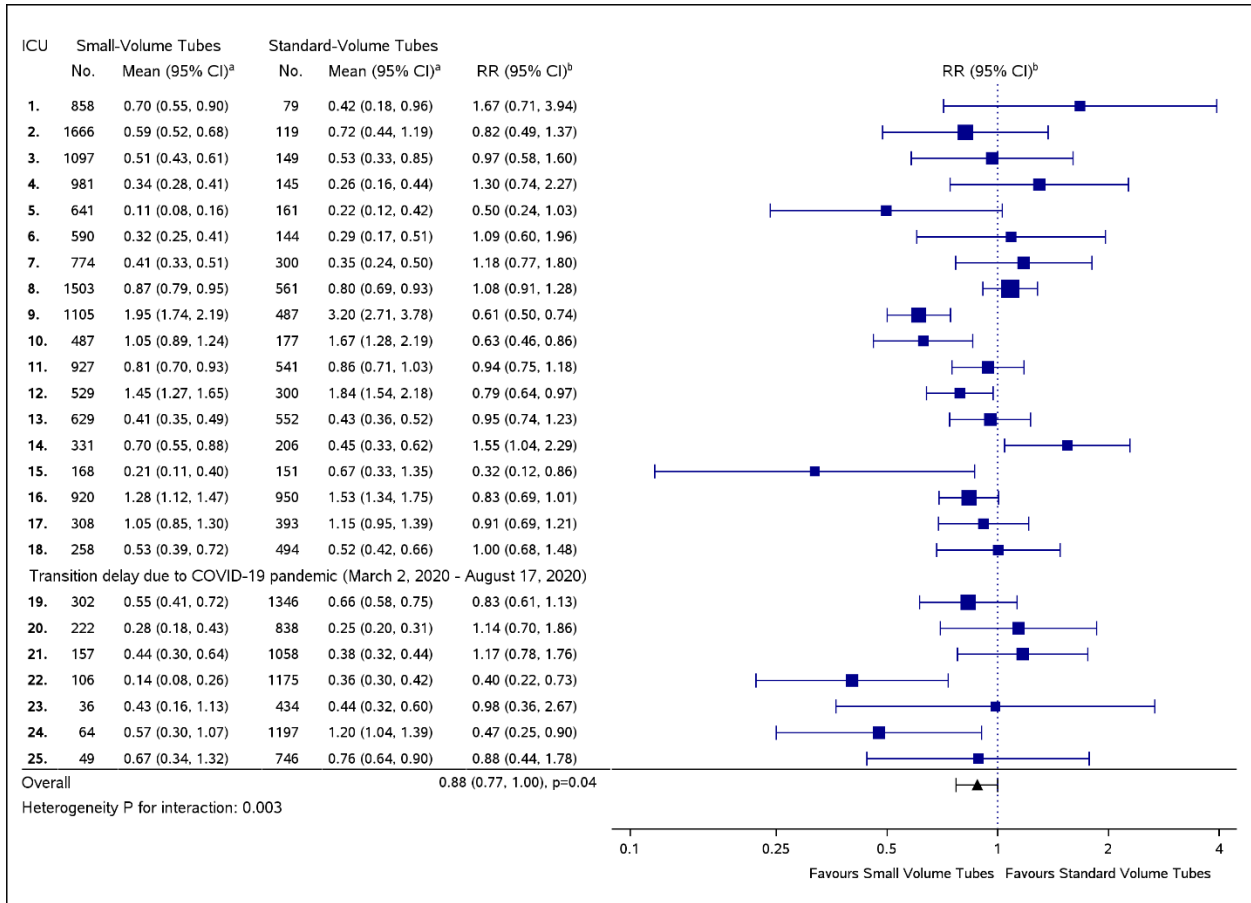

55  
 56  
 57 CI, confidence interval; ICU, intensive care unit; RR, relative risk.

58 <sup>a</sup> Mean (95% CI) RBC units per patient per median ICU stay.

59 <sup>b</sup> Relative risk is adjusted for age and sex.

60 **eFigure 2.** Stratified box-and-whisker plot showing the mean (95% confidence interval) number of RBC units per  
 61 patient per median ICU stay at individual ICUs. Includes patients admitted during the transition delay due to  
 62 COVID-19 pandemic. The square boxes denote the relative risk of RBC transfusion before and after transition to  
 63 small-volume tubes adjusted for age and sex. The mean area of the squares is proportional to the corresponding  
 64 total sample size of the ICU. Each ICU is represented by one row and displayed in the order of transition to small-  
 65 volume tubes.

66  
 67  
 68

69  
70

**eTable 1: Blood collection tube volumes before and after transition to small-volume tubes at participating ICUs**

| Site | Patients<br>≥48 hours in ICU | Standard-Volume Tubes / Small-Volume Tubes (mL) |                 |                               |                         |                |                              |                                      |
|------|------------------------------|-------------------------------------------------|-----------------|-------------------------------|-------------------------|----------------|------------------------------|--------------------------------------|
|      |                              | EDTA<br>(lavender)                              | Fluoride (grey) | Lithium<br>heparin<br>(green) | Citrate<br>(light blue) | Serum<br>(red) | Serum<br>separator<br>(gold) | Plasma<br>separator<br>(light green) |
| A    | 2064                         | 4.0 / 2.0                                       | Not Used        | 6.0 / 2.0                     | 1.8 / 1.8               | 6.0 / 2.0      | 5.0 / 3.5                    | 4.5 / 3.0                            |
| B    | 1870                         | 4.0 / 2.0                                       | 6.0 / 2.0       | 4.0 / 2.0                     | 2.7 / 1.8               | 5.0 / 3.0      | 5.0 / 3.5                    | 4.5 / 3.0                            |
| C    | 1785                         | 4.0 / 2.0                                       | 4.0 / 2.0       | 4.0 / 2.0                     | 1.8 / 1.8               | 9.0 / 2.0      | 5.0 / 3.5                    | 4.5 / 3.0                            |
| D    | 1648                         | 4.0 / 2.0                                       | 4.0 / 2.0       | 4.0 / 2.0                     | 2.7 / 1.8               | 4.0 / 2.0      | Not Used                     | Not Used                             |
| E    | 1592                         | 4.0 / 2.0                                       | Not Used        | 4.0 / 2.0                     | 2.7 / 1.8               | 4.0 / 2.0      | 3.5 / 3.5                    | 4.5 / 3.0                            |
| F    | 1468                         | 2.0 / 2.0                                       | 6.0 / 2.0       | 4.0 / 3.0                     | 2.7 / 1.8               | 6.0 / 3.0      | 5.0 / 3.5                    | 4.5 / 3.0                            |
| G    | 1281                         | 4.0 / 2.0                                       | Not Used        | 4.0 / 2.0                     | 2.7 / 1.8               | 6.0 / 2.0      | 5.0 / 3.5                    | 4.5 / 3.0                            |
| H    | 1261                         | 4.0 / 2.0                                       | 4.0 / 2.0       | Not Used                      | 2.7 / 1.8               | 6.0 / 2.0      | 5.0 / 3.5                    | 4.5 / 3.0                            |
| I    | 1246                         | 4.0 / 2.0                                       | 4.0 / 2.0       | 4.0 / 2.0                     | 2.7 / 1.8               | 4.0 / 2.0      | Not Used                     | Not Used                             |
| J    | 1215                         | 2.0 / 2.0                                       | 6.0 / 2.0       | 4.0 / 2.0                     | 2.7 / 1.8               | 10.0 / 2.0     | 5.0 / 3.5                    | 4.5 / 3.0                            |
| K    | 1181                         | 4.0 / 2.0                                       | Not Used        | 4.0 / 2.0                     | 2.7 / 1.8               | 6.0 / 2.0      | 5.0 / 3.5                    | 4.5 / 3.0                            |
| L    | 1126                         | 4.0 / 2.0                                       | 4.0 / 2.0       | 2.0 / 2.0                     | 2.7 / 1.8               | 3.0 / 2.0      | 3.5 / 3.5                    | 3.0 / 3.0                            |
| M    | 1074                         | 2.0 / 2.0                                       | 6.0 / 2.0       | 4.0 / 2.0                     | 2.7 / 1.8               | 10.0 / 2.0     | 5.0 / 3.5                    | 4.5 / 3.0                            |
| N    | 1060                         | 2.0 / 2.0                                       | 6.0 / 2.0       | 4.0 / 2.0                     | 2.7 / 1.8               | 10.0 / 2.0     | 5.0 / 3.5                    | 4.5 / 3.0                            |
| O    | 937                          | 3.0 / 2.0                                       | Not Used        | 4.0 / 2.0                     | 2.7 / 1.8               | 4.0 / 2.0      | 3.5 / 3.5                    | Not Used                             |
| P    | 829                          | 4.0 / 2.0                                       | 4.0 / 2.0       | Not Used                      | 2.7 / 1.8               | 6.0 / 2.0      | 5.0 / 3.5                    | 4.5 / 3.0                            |
| Q    | 802                          | 4.0 / 2.0                                       | 2.0 / 2.0       | 4.0 / 2.0                     | 1.8 / 1.8               | 4.0 / 4.0      | 3.5 / 3.5                    | Not Used                             |
| R    | 795                          | 4.0 / 2.0                                       | 4.0 / 2.0       | Not Used                      | 2.7 / 1.8               | 6.0 / 2.0      | 5.0 / 3.5                    | 4.5 / 3.0                            |
| S    | 752                          | 3.0 / 2.0                                       | Not Used        | 4.0 / 2.0                     | 2.7 / 1.8               | 4.0 / 2.0      | 5.0 / 3.5                    | 4.5 / 3.0                            |
| T    | 734                          | 3.0 / 2.0                                       | 2.5 / 2.0       | 3.0 / 2.0                     | 2.7 / 1.8               | Not Used       | 5.0 / 3.5                    | 4.5 / 3.0                            |

| Site | Patients<br>≥48 hours in ICU | Standard-Volume Tubes / Small-Volume Tubes (mL) |                 |                               |                         |                |                              |                                      |
|------|------------------------------|-------------------------------------------------|-----------------|-------------------------------|-------------------------|----------------|------------------------------|--------------------------------------|
|      |                              | EDTA<br>(lavender)                              | Fluoride (grey) | Lithium<br>heparin<br>(green) | Citrate<br>(light blue) | Serum<br>(red) | Serum<br>separator<br>(gold) | Plasma<br>separator<br>(light green) |
| U    | 701                          | 4.0 / 2.0                                       | 6.0 / 2.0       | 4.0 / 2.0                     | 2.7 / 1.8               | 6.0 / 2.0      | 5.0 / 3.5                    | 4.5 / 3.0                            |
| V    | 664                          | 4.0 / 2.0                                       | 4.0 / 2.0       | Not Used                      | 2.7 / 1.8               | 6.0 / 2.0      | 5.0 / 3.5                    | 4.5 / 3.0                            |
| W    | 537                          | 4.0 / 2.0                                       | 4.0 / 2.0       | 4.0 / 2.0                     | 4.5 / 1.8               | 4.0 / 2.0      | Not Used                     | Not Used                             |
| X    | 470                          | 4.0 / 2.0                                       | 2.0 / 2.0       | 6.0 / 2.0                     | 4.5 / 1.8               | 10.0 / 2.0     | 5.0 / 3.5                    | 10.0 / 3.0                           |
| Y    | 319                          | 3.0 / 2.0                                       | 2.5 / 2.0       | 3.0 / 2.0                     | 2.7 / 1.8               | Not Used       | 5.0 / 3.5                    | 4.5 / 3.0                            |

71 EDTA, ethylenediaminetetraacetic acid.

72

73 **eTable 2: Cluster characteristics and baseline characteristics of all patients admitted to ICU ≥48 hours (secondary population)**

74

| Characteristics                                   | Clusters                                                 |                                         |
|---------------------------------------------------|----------------------------------------------------------|-----------------------------------------|
| Sites, No.                                        | 25                                                       |                                         |
| Province in Canada, No. of sites                  |                                                          |                                         |
| Quebec, Canada                                    | 14                                                       |                                         |
| Ontario, Canada                                   | 9                                                        |                                         |
| Manitoba, Canada                                  | 1                                                        |                                         |
| New Brunswick, Canada                             | 1                                                        |                                         |
| Total cluster size, median (IQR), patients        | 1074 (752, 1281)                                         |                                         |
| Cluster-period size, median (IQR), patients       | 70 (48, 97)                                              |                                         |
| Characteristics                                   |                                                          |                                         |
|                                                   | <b>All patients admitted to ICU ≥48 hours (n=27,411)</b> |                                         |
| <b>Characteristics</b>                            | <b>Small-Volume Tubes (n=14,708)</b>                     | <b>Standard-Volume Tubes (n=12,703)</b> |
| Age, mean (SD), years                             | 63.3 (15.8)                                              | 62.8 (16.1)                             |
| Age > 70 years, No. (%)                           | 5448/14708 (37.3)                                        | 4652/12703 (37.3)                       |
| Sex, No. (%)                                      |                                                          |                                         |
| Female                                            | 5804/14706 (39.5)                                        | 4832/12625 (38.3)                       |
| Male                                              | 8902/14706 (60.5)                                        | 7793/12625 (61.7)                       |
| Most responsible diagnosis <sup>a</sup> , No. (%) |                                                          |                                         |
| Cardiovascular                                    | 3329/13138 (25.3) <sup>b</sup>                           | 1813/9659 (18.8) <sup>b</sup>           |
| Nervous System                                    | 1586/13138 (12.1)                                        | 1365/9659 (14.1)                        |
| Other                                             | 1469/13138 (11.2) <sup>b</sup>                           | 784/9659 (8.1) <sup>b</sup>             |
| Respiratory                                       | 1461/13138 (11.1)                                        | 996/9659 (10.3)                         |
| Injury                                            | 1363/13138 (10.4) <sup>b</sup>                           | 1932/9659 (20.0) <sup>b</sup>           |
| Cancer                                            | 1152/13138 (8.8)                                         | 890/9659 (9.2)                          |
| Infection                                         | 1134/13138 (8.6)                                         | 743/9659 (7.7)                          |
| Digestive                                         | 1106/13138 (8.4)                                         | 814/9659 (8.4)                          |
| Genitourinary                                     | 299/13138 (2.3)                                          | 209/9659 (2.2)                          |
| Endocrine                                         | 239/13138 (1.8)                                          | 113/9659 (1.2)                          |

| Characteristics                                               | All patients admitted to ICU ≥48 hours (n=27,411) |                                  |
|---------------------------------------------------------------|---------------------------------------------------|----------------------------------|
|                                                               | Small-Volume Tubes (n=14,708)                     | Standard-Volume Tubes (n=12,703) |
| Initial hemoglobin concentration (female) <sup>c</sup> , g/dL |                                                   |                                  |
| mean (SD)                                                     | 10.45 (2.11)                                      | 10.64 (2.05)                     |
| median (IQR)                                                  | 10.40 (8.90, 11.90)                               | 10.70 (9.20, 12.10)              |
| Initial hemoglobin concentration (male) <sup>c</sup> , g/dL   |                                                   |                                  |
| mean (SD)                                                     | 11.16 (2.44)                                      | 11.27 (2.33)                     |
| median (IQR)                                                  | 11.20 (9.30, 12.90)                               | 11.30 (9.50, 12.90)              |
| Initial hemoglobin (female) <sup>c</sup> , g/dL               |                                                   |                                  |
| <7.0, No. (%)                                                 | 186/5431 (3.4)                                    | 132/4560 (2.9)                   |
| 7.0-9.0, No. (%)                                              | 1216/5431 (22.4)                                  | 863/4560 (18.9)                  |
| 9.0-11.0, No. (%)                                             | 1875/5431 (34.5)                                  | 1536/4560 (33.7)                 |
| 11.0-13.0, No. (%)                                            | 1545/5431 (28.4)                                  | 1487/4560 (32.6)                 |
| >13.0, No. (%)                                                | 609/5431 (11.2)                                   | 542/4560 (11.9)                  |
| Initial hemoglobin (male) <sup>c</sup> , g/dL                 |                                                   |                                  |
| <7.0, No. (%)                                                 | 273/8380 (3.3)                                    | 171/7384 (2.3)                   |
| 7.0-9.0, No. (%)                                              | 1434/8380 (17.1)                                  | 1137/7384 (15.4)                 |
| 9.0-11.0, No. (%)                                             | 2234/8380 (26.7)                                  | 1983/7384 (26.9)                 |
| 11.0-13.0, No. (%)                                            | 2489/8380 (29.7)                                  | 2346/7384 (31.8)                 |
| >13.0, No. (%)                                                | 1950/8380 (23.3)                                  | 1747/7384 (23.7)                 |
| Creatinine <sup>c</sup> , mg/dL                               |                                                   |                                  |
| mean (SD)                                                     | 1.53 (1.50) <sup>b</sup>                          | 1.37 (1.33) <sup>b</sup>         |
| median (IQR)                                                  | 1.00 (0.75, 1.57)                                 | 0.94 (0.71, 1.38)                |
| Creatinine <sup>c</sup> , mg/dL                               |                                                   |                                  |
| <1.5, No. (%)                                                 | 9508/13018 (73.0)                                 | 9223/11850 (77.8)                |
| 1.5-3.0, No. (%)                                              | 2156/13018 (16.6)                                 | 1671/11850 (14.1)                |
| >3.0, No. (%)                                                 | 1354/13018 (10.4)                                 | 956/11850 (8.1)                  |

75 ICU, intensive care unit; IQR, interquartile range; SD, standard deviation.

76 <sup>a</sup> ICD codes. Data was provided by 20/25 participating ICUs.

77 <sup>b</sup> Standardized difference >0.1.

78 <sup>c</sup> Hemoglobin and creatinine data was provided by 24/25 participating ICUs.

79 SI conversion factors: To convert hemoglobin to g/L, multiply values by 10. To convert creatinine to umol/L, multiply values by 88.4.

80 **eTable 3. Baseline characteristics of patients admitted during the pandemic-related delay and other study periods**

81

|                                         | Patients admitted during pandemic-related delay in transitions <sup>a</sup> | Patients admitted during other study periods |
|-----------------------------------------|-----------------------------------------------------------------------------|----------------------------------------------|
| Total, n                                | 6,210                                                                       | 21,201                                       |
| Age, years Mean (SD)                    | 62.5 (15.9)                                                                 | 63.2 (16.0)                                  |
| Female Sex, n (%)                       | 2368 (38.4)                                                                 | 8268 (39.1)                                  |
| Most responsible diagnosis <sup>b</sup> |                                                                             |                                              |
| Cardiovascular                          | 1135 (21.8)                                                                 | 4007 (22.8)                                  |
| Nervous system                          | 640 (12.3)                                                                  | 2311 (13.1)                                  |
| Respiratory                             | 529 (10.2)                                                                  | 1928 (11.0)                                  |
| Injury                                  | 753 (14.5)                                                                  | 2542 (14.4)                                  |
| Infection                               | 394 (7.6)                                                                   | 1483 (8.4)                                   |
| Cancer                                  | 462 (8.9)                                                                   | 1580 (9.0)                                   |
| Digestive                               | 405 (7.8)                                                                   | 1515 (8.6)                                   |
| Genitourinary                           | 101 (1.9)                                                                   | 407 (2.3)                                    |
| Endocrine                               | 85 (1.6)                                                                    | 267 (1.5)                                    |
| Other                                   | 700 (13.5) <sup>c</sup>                                                     | 1553 (8.8) <sup>c</sup>                      |
| Hemoglobin concentration (female), g/dL |                                                                             |                                              |
| Mean (SD)                               | 10.55 (2.12)                                                                | 10.53 (2.07)                                 |
| Median (IQR)                            | 10.50 (9.00, 12.00)                                                         | 10.50 (9.00, 12.00)                          |
| Hemoglobin concentration (male), g/dL   |                                                                             |                                              |
| Mean (SD)                               | 11.40 (2.41)                                                                | 11.16 (2.38)                                 |
| Median (IQR)                            | 11.50 (9.60, 13.20)                                                         | 11.20 (9.40, 12.90)                          |
| Initial hemoglobin <7.0 g/dL, n (%)     | 165 (2.8)                                                                   | 598 (3.0)                                    |
| Creatinine, mg/dL                       |                                                                             |                                              |
| Mean (SD)                               | 1.44 (1.43)                                                                 | 1.46 (1.42)                                  |
| Median (IQR)                            | 0.95 (0.72, 1.45)                                                           | 0.97 (0.74, 1.50)                            |

82 ICU, intensive care unit; IQR, interquartile range; SD, standard deviation.

83 <sup>a</sup>Pandemic period lasted from March 2, 2021 to August 17, 2021 at all sites.

84 <sup>b</sup>ICD codes. Denominator: 22,797 – all patients admitted before and after transition, 5,204 – patients admitted during pandemic.

85 <sup>c</sup>Standardized difference >0.1 between patients admitted during pandemic-related transition delay and other study periods.

86



87  
88

**eTable 4. Selected baseline characteristics in individual ICUs**

| Site | Baseline characteristics |                       |                       |                       |                                                              |                       |                                                            |                       |
|------|--------------------------|-----------------------|-----------------------|-----------------------|--------------------------------------------------------------|-----------------------|------------------------------------------------------------|-----------------------|
|      | Age, mean (SD), years    |                       | Sex – Female, No. (%) |                       | Initial hemoglobin (female), median (IQR), g/dL, 24/25 sites |                       | Initial hemoglobin (male), median (IQR), g/dL, 24/25 sites |                       |
|      | Small-Volume Tubes       | Standard-Volume Tubes | Small-Volume Tubes    | Standard-Volume Tubes | Small-Volume Tubes                                           | Standard-Volume Tubes | Small-Volume Tubes                                         | Standard-Volume Tubes |
| 1.   | 65.0 (15.2)              | 68.6 (12.5)           | 265/640 (41.1)        | 30/79 (38.0)          | 10.6 (9.0, 11.8)                                             | 10.4 (9.4, 11.6)      | 11.5 (9.7, 12.8)                                           | 11.0 (9.7, 12.2)      |
| 2.   | 57.1 (16.5)              | 57.8 (16.0)           | 506/1278 (40.0)       | 53/119 (45.0)         | 10.1 (8.4, 11.6)                                             | 10.1 (8.6, 12.1)      | 11.1 (9.0, 13.2)                                           | 10.8 (8.7, 13.3)      |
| 3.   | 64.9 (16.1)              | 66.8 (14.6)           | 398/826 (48.2)        | 70/149 (47.0)         | 9.7 (8.2, 11.2)                                              | 9.8 (7.9, 10.9)       | 10.0 (8.4, 12.0)                                           | 10.4 (9.0, 12.1)      |
| 4.   | 69.9 (16.0)              | 70.2 (17.5)           | 324/748 (43.3)        | 65/145 (44.8)         | 10.7 (9.3, 12.3)                                             | 10.3 (8.0, 11.6)      | 11.7 (9.7, 13.3)                                           | 11.4 (9.4, 13.0)      |
| 5.   | 64.3 (16.1)              | 61.4 (17.4)           | 187/448 (41.7)        | 76/161 (47.2)         | 10.7 (9.1, 12.1)                                             | 10.5 (9.0, 12.2)      | 11.1 (9.0, 12.9)                                           | 10.7 (9.0, 12.3)      |
| 6.   | 61.1 (17.9)              | 63.5 (18.9)           | 171/443 (38.6)        | 53/144 (36.8)         | 11.0 (9.3, 12.3)                                             | 11.2 (10.1, 12.3)     | 12.1 (9.5, 13.8)                                           | 11.4 (9.1, 13.7)      |
| 7.   | 65.4 (15.3)              | 65.7 (13.8)           | 236/554 (42.6)        | 110/300 (36.7)        | 11.1 (9.5, 12.4)                                             | 11.1 (9.2, 12.2)      | 12.1 (9.8, 13.6)                                           | 11.6 (9.4, 13.6)      |
| 8.   | 66.1 (12.3)              | 66.3 (12.6)           | 355/1011 (35.1)       | 201/560 (36.0)        | 10.1 (9.1, 11.1)                                             | 10.4 (9.3, 11.5)      | 10.7 (9.3, 12.2)                                           | 10.8 (9.6, 12.1)      |
| 9.   | 64.8 (14.9)              | 66.5 (14.3)           | 244/696 (35.1)        | 172/487 (35.3)        | 10.5 (9.2, 11.9)                                             | 9.8 (8.8, 11.6)       | 10.5 (9.0, 12.0)                                           | 10.4 (8.9, 11.8)      |
| 10.  | 59.7 (14.7)              | 60.0 (13.7)           | 125/329 (38.0)        | 66/177 (37.3)         | 10.0 (8.5, 11.4)                                             | 10.0 (8.6, 11.6)      | 10.5 (8.7, 12.8)                                           | 9.9 (8.6, 12.4)       |
| 11.  | 61.1 (17.5)              | 59.4 (17.8)           | 248/598 (41.5)        | 205/541 (37.9)        | 10.5 (8.8, 12.2)                                             | 10.8 (9.2, 12.3)      | 11.3 (9.4, 13.1)                                           | 11.1 (9.3, 12.8)      |
| 12.  | 67.1 (12.0)              | 66.7 (11.1)           | 99/313 (31.6)         | 96/300 (32.0)         | 10.1 (8.7, 11.3)                                             | 10.0 (8.9, 11.2)      | 10.1 (9.0, 11.1)                                           | 10.1 (9.0, 11.5)      |
| 13.  | 62.8 (13.7)              | 64.9 (13.1)           | 173/385 (44.9)        | 212/552 (38.4)        | 10.2 (8.6, 11.8)                                             | 9.6 (8.5, 11.4)       | 10.9 (9.1, 12.8)                                           | 10.7 (9.2, 12.7)      |
| 14.  | 62.2 (17.3)              | 63.8 (17.6)           | 79/198 (39.9)         | 94/206 (45.6)         | 10.5 (8.3, 11.7)                                             | 10.1 (8.9, 11.9)      | 10.0 (7.8, 11.9)                                           | 10.6 (8.4, 12.3)      |
| 15.  | 67.0 (16.2)              | 63.5 (17.5)           | 25/78 (32.1)          | 55/151 (36.4)         | 11.6 (10.5, 13.1)                                            | 11.0 (9.6, 12.6)      | 12.7 (10.8, 14.2)                                          | 12.5 (10.1, 13.7)     |
| 16.  | 64.5 (15.2)              | 65.0 (15.0)           | 198/524 (37.8)        | 362/950 (38.1)        | 10.2 (8.7, 12.1)                                             | 9.7 (8.5, 11.6)       | 11.2 (9.2, 12.9)                                           | 10.6 (8.8, 12.6)      |
| 17.  | 61.8 (15.0)              | 63.8 (15.0)           | 64/150 (42.7)         | 146/393 (37.2)        | 10.8 (9.2, 12.1)                                             | 10.7 (9.5, 12.4)      | 11.2 (9.5, 13.0)                                           | 11.3 (9.5, 12.9)      |
| 18.  | 64.0 (15.3)              | 64.6 (15.2)           | 39/105 (37.1)         | 197/494 (39.9)        | N/A                                                          | N/A                   | N/A                                                        | N/A                   |
| 19.  | 59.4 (18.1)              | 59.8 (17.9)           | 104/302 (34.4)        | 386/978 (39.5)        | 10.7 (9.5, 12.0)                                             | 10.8 (9.2, 12.3)      | 11.9 (10.0, 13.3)                                          | 11.2 (9.4, 12.9)      |
| 20.  | 65.4 (14.3)              | 65.9 (15.4)           | 103/222 (46.4)        | 266/603 (44.1)        | 11.1 (9.2, 12.8)                                             | 11.2 (9.8, 12.5)      | 12.3 (10.5, 13.4)                                          | 11.8 (10.1, 13.3)     |
| 21.  | 64.4 (14.1)              | 65.0 (14.2)           | 52/157 (33.1)         | 257/785 (32.7)        | 10.5 (9.5, 11.3)                                             | 10.5 (9.6, 11.7)      | 11.7 (10.0, 13.0)                                          | 11.7 (10.4, 12.9)     |
| 22.  | 59.8 (15.8)              | 57.6 (17.5)           | 44/106 (41.5)         | 349/931 (37.5)        | 11.0 (10.3, 12.1)                                            | 10.9 (9.5, 12.0)      | 11.7 (10.8, 13.3)                                          | 11.9 (10.3, 13.2)     |
| 23.  | 63.7 (13.7)              | 64.2 (14.8)           | 12/36 (33.3)          | 102/298 (34.2)        | 10.9 (9.2, 13.1)                                             | 10.5 (8.7, 12.1)      | 11.3 (8.9, 13.7)                                           | 11.2 (9.5, 12.7)      |
| 24.  | 59.6 (19.8)              | 61.7 (18.8)           | 19/64 (29.7)          | 284/863 (32.9)        | 10.7 (9.4, 12.5)                                             | 10.8 (9.5, 12.4)      | 12.0 (9.3, 13.4)                                           | 11.8 (10.4, 13.2)     |
| 25.  | 58.7 (14.2)              | 58.8 (14.6)           | 20/49 (40.8)          | 271/545 (49.7)        | 10.7 (9.3, 11.5)                                             | 11.2 (9.9, 12.4)      | 11.4 (9.7, 12.6)                                           | 11.6 (9.7, 13.4)      |

89 IQR, interquartile range; N/A, not available; SD, standard deviation

90  
91

92 **eTable 5: Study outcomes of all patients admitted to ICU ≥48 hours (secondary population)**

93

| Outcome                                                                                                        |                 | All patients admitted ≥48 hrs <sup>a</sup> , n=27,411 |                                    |                                        |                                    |
|----------------------------------------------------------------------------------------------------------------|-----------------|-------------------------------------------------------|------------------------------------|----------------------------------------|------------------------------------|
|                                                                                                                |                 | Small-Volume Tubes,<br>n=14,708                       | Standard-Volume Tubes,<br>n=12,703 | RR <sup>b</sup> (95% CI)               | MD <sup>b</sup> (95% CI)           |
| <b>Primary outcome</b>                                                                                         |                 |                                                       |                                    |                                        |                                    |
| RBC units transfused in ICU per patient per median ICU stay                                                    | LSM (95% CI)    | 0.71 (0.53, 0.93)                                     | 0.80 (0.61, 1.06)                  | 0.88 (0.77, 1.00), p=0.04 <sup>c</sup> | -0.10 (-0.21, -0.002)              |
|                                                                                                                | Crude mean (SD) | 0.78 (2.20)                                           | 0.84 (2.67)                        |                                        |                                    |
| <b>Secondary outcomes</b>                                                                                      |                 |                                                       |                                    |                                        |                                    |
| Specimens with insufficient quantity for analysis <sup>d,e</sup>                                               | No. (%)         | 65 (0.023)                                            | 64 (0.028)                         |                                        | -0.006 (-0.02, 0.003) <sup>f</sup> |
| Patients received ≥ 1 units RBC transfusion in ICU                                                             | No. (%)         | 4296 (29.2)                                           | 3840 (30.2)                        | 0.97 (0.90, 1.04)                      | -1.02 (-3.17, 0.98) <sup>f</sup>   |
| Change in hemoglobin from ICU admission to ICU discharge adjusted for RBC transfusions <sup>g,h,i</sup> , g/dL | Median (IQR)    | -1.40 (-3.10, -0.30)                                  | -1.50 (-3.20, -0.40)               |                                        | 0.17 (0.05, 0.29)                  |
| Duration of ICU admission, days                                                                                | Median (IQR)    | 4.0 (3.0, 8.0)                                        | 4.0 (3.0, 7.0)                     | 0.97 (0.93, 1.01)                      | -0.21 (-0.47, 0.05)                |
| Duration of hospital admission, days                                                                           | Median (IQR)    | 11.0 (7.0, 20.0)                                      | 11.0 (7.0, 19.0)                   | 1.00 (0.98, 1.03)                      | 0.05 (-0.31, 0.40)                 |
| Mortality in ICU                                                                                               | No. (%)         | 2094 (14.2)                                           | 1493 (11.8)                        | 0.98 (0.88, 1.09) <sup>j</sup>         | -0.31 (-1.92, 1.13) <sup>f</sup>   |
| Mortality in hospital                                                                                          | No. (%)         | 2538 (17.3)                                           | 1887 (14.9)                        | 0.99 (0.90, 1.09) <sup>j</sup>         | -0.18 (-1.87, 1.35) <sup>f</sup>   |

| Outcome                                                                                                             |              | All patients <sup>a</sup> , n=27,411 |                                    |                          |                          |
|---------------------------------------------------------------------------------------------------------------------|--------------|--------------------------------------|------------------------------------|--------------------------|--------------------------|
|                                                                                                                     |              | Small-Volume Tubes,<br>n=14,708      | Standard-Volume Tubes,<br>n=12,703 | RR <sup>b</sup> (95% CI) | MD <sup>b</sup> (95% CI) |
| <b>Post-hoc exploratory outcomes</b>                                                                                |              |                                      |                                    |                          |                          |
| Hemoglobin within 48hrs of ICU discharge <sup>g,i</sup> , g/dL                                                      | Median (IQR) | 9.50 (8.30, 11.20)                   | 9.60 (8.40, 11.20)                 | 1.01 (1.00, 1.02)        | 0.11 (0.03, 0.19)        |
| Change in hemoglobin from ICU admission to ICU discharge <sup>g,i</sup> , g/dL                                      | Median (IQR) | -0.80 (-2.00, 0.20)                  | -0.90 (-2.10, 0.10)                |                          | 0.12 (0.05, 0.19)        |
| Change in hemoglobin from ICU admission to ICU discharge in patients without RBC transfusions <sup>g,k</sup> , g/dL | Median (IQR) | -0.90 (-2.00, 0.00)                  | -1.00 (-2.10, 0.00)                |                          | 0.10 (0.02, 0.18)        |

94

95 CI, confidence interval; ICU, intensive care unit; IQR, interquartile range; LSM, least squares mean; MD, mean difference; RBC, red blood cell; RR, relative risk;

96 SD, standard deviation.

97 <sup>a</sup> Patients admitted during pandemic-related delay in transitions to small-volume tubes (March 2, 2020 - August 17, 2020) were included.

98 <sup>b</sup> Relative Risk and Mean Difference results were adjusted for age and sex and accounted for the stepped wedge design with periods modelled as fixed effects,

99 ICU units as a random effect, and length of ICU stay as an offset.

100 <sup>c</sup> P value represents the result of the hypothesis test for the significance of the intervention (transition to small-volume tubes) effect and was calculated by

101 generalized linear mixed model adjusted for age and sex and accounted for the stepped wedge design.

102 <sup>d</sup> Number of tubes with insufficient quantity for analysis per total number of specimens sent for hemoglobin (ethylenediaminetetraacetic acid [EDTA] tubes)

103 and creatinine (lithium or sodium heparin tubes) tests during ICU admission; analyzed using Chi-Square test of equality of two proportions.

104 <sup>e</sup> Denominators for the small-volume tube group vs. standard-volume tube group were 285273 vs. 224868, respectively.

105 <sup>f</sup> Percent difference in % was presented for binary outcomes and was adjusted for age and sex and accounted for the stepped wedge design. Absolute percent

106 difference in % without any adjustment was presented for specimens with insufficient quantity outcome.

107 <sup>g</sup> Analyses were adjusted for baseline admission hemoglobin in addition to adjusting for age and sex.

108 <sup>h</sup> Hemoglobin adjusted for RBC transfusion 1 transfusion = Hb – 1 g/dL. Values <0 were substituted with 0 (3.7% of values).

109 <sup>i</sup> Denominators for the small-volume tube group vs. standard-volume tube group were 13170 vs. 11457, respectively.

110 <sup>j</sup> Unadjusted RR (95% CI) for Mortality in ICU and Mortality in hospital were 1.21 (1.14, 1.29) and 1.16 (1.10, 1.23), respectively.

111 <sup>k</sup> Denominators for the small-volume tube group vs. standard-volume tube group were 9052 vs. 7851, respectively.

112

113

114 **eTable 6: Study outcomes among patients with any duration of ICU admission (excluding patients admitted during pandemic-**  
 115 **related delay)**  
 116

| Outcome                                                                                                        |                 | Population with any duration of ICU admission excluding patients admitted during pandemic-delay <sup>a</sup> , n=38,882 |                                    |                                        |                                   |
|----------------------------------------------------------------------------------------------------------------|-----------------|-------------------------------------------------------------------------------------------------------------------------|------------------------------------|----------------------------------------|-----------------------------------|
|                                                                                                                |                 | Small-Volume Tubes,<br>n=18,616                                                                                         | Standard-Volume Tubes,<br>n=20,266 | RR <sup>b</sup> (95% CI)               | MD <sup>b</sup> (95% CI)          |
| <b>Primary outcome</b>                                                                                         |                 |                                                                                                                         |                                    |                                        |                                   |
| RBC units transfused in ICU per patient per 4 days in ICU (median in primary analysis)                         | LSM (95% CI)    | 0.77 (0.56, 1.07)                                                                                                       | 0.80 (0.58, 1.10)                  | 0.97 (0.83, 1.14), p=0.72 <sup>c</sup> | -0.02 (-0.16, 0.10)               |
|                                                                                                                | Crude mean (SD) | 0.86 (4.00)                                                                                                             | 0.87 (4.10)                        |                                        |                                   |
| <b>Secondary outcomes</b>                                                                                      |                 |                                                                                                                         |                                    |                                        |                                   |
| Specimens with insufficient quantity for analysis <sup>d,e</sup>                                               | No. (%)         | 50 (0.022)                                                                                                              | 80 (0.035)                         |                                        | -0.13 (-0.24, -0.01) <sup>f</sup> |
| Patients received ≥ 1 units RBC transfusion in ICU                                                             | No. (%)         | 3753 (20.2)                                                                                                             | 4204 (20.7)                        | 0.98 (0.91, 1.05)                      | -0.51 (-2.07, 0.94) <sup>f</sup>  |
| Change in hemoglobin from ICU admission to ICU discharge adjusted for RBC transfusions <sup>g,h,i</sup> , g/dL | Median (IQR)    | -0.80 (-2.20, 0.00)                                                                                                     | -0.90 (-2.30, 0.00)                |                                        | 0.11 (0.02, 0.20)                 |
| Duration of ICU admission, days                                                                                | Median (IQR)    | 2.0 (1.0, 5.0)                                                                                                          | 2.0 (1.0, 5.0)                     | 0.96 (0.92, 1.00)                      | -0.18 (-0.37, -0.001)             |
| Duration of hospital admission, days                                                                           | Median (IQR)    | 7.0 (5.0, 13.0)                                                                                                         | 7.0 (5.0, 12.0)                    | 1.02 (0.99, 1.05)                      | 0.20 (-0.08, 0.48)                |
| Mortality in ICU                                                                                               | No. (%)         | 2483 (13.3)                                                                                                             | 2220 (11.0)                        | 0.96 (0.88, 1.05) <sup>j</sup>         | -0.58 (-1.92, 0.65) <sup>f</sup>  |
| Mortality in hospital                                                                                          | No. (%)         | 2915 (15.7)                                                                                                             | 2696 (13.3)                        | 0.96 (0.89, 1.04) <sup>j</sup>         | -0.66 (-2.06, 0.63) <sup>f</sup>  |

| Outcome                                                                                                             |              | Population with any duration of ICU admission excluding patients admitted during pandemic-related delay <sup>a</sup> , n=38,882 |                                    |                          |                          |
|---------------------------------------------------------------------------------------------------------------------|--------------|---------------------------------------------------------------------------------------------------------------------------------|------------------------------------|--------------------------|--------------------------|
|                                                                                                                     |              | Small-Volume Tubes,<br>n=18,616                                                                                                 | Standard-Volume Tubes,<br>n=20,266 | RR <sup>b</sup> (95% CI) | MD <sup>b</sup> (95% CI) |
| <b>Post-hoc exploratory outcomes</b>                                                                                |              |                                                                                                                                 |                                    |                          |                          |
| Hemoglobin within 48hrs of ICU discharge <sup>g,i</sup> , g/dL                                                      | Median (IQR) | 10.00 (8.60, 11.70)                                                                                                             | 10.00 (8.60, 11.60)                | 1.01 (1.00, 1.01)        | 0.08 (0.01, 0.14)        |
| Change in hemoglobin from ICU admission to ICU discharge <sup>g,i</sup> , g/dL                                      | Median (IQR) | -0.50 (-1.50, 0.00)                                                                                                             | -0.60 (-1.60, 0.00)                |                          | 0.08 (0.02, 0.13)        |
| Change in hemoglobin from ICU admission to ICU discharge in patients without RBC transfusions <sup>g,k</sup> , g/dL | Median (IQR) | -0.50 (-1.40, 0.00)                                                                                                             | -0.60 (-1.50, 0.00)                |                          | 0.06 (0.01, 0.12)        |

117 CI, confidence interval; ICU, intensive care unit; IQR, interquartile range; LSM, least squares mean; MD, mean difference; RBC, red blood cell; RR, relative risk;  
118 SD, standard deviation.

119 <sup>a</sup> Patients admitted during pandemic-related delay in transitions to small-volume tubes (March 2, 2020 - August 17, 2020) were excluded.

120 <sup>b</sup> Relative Risk and Mean Difference were adjusted for age and sex and accounted for the stepped wedge design with periods modelled as fixed effects,  
121 ICU units as a random effect, and length of ICU stay as an offset.

122 <sup>c</sup> P value represents the result of the hypothesis test for the significance of the intervention (transition to small-volume tubes) effect and was calculated by  
123 generalized linear mixed model adjusted for age and sex and accounted for the stepped wedge design.

124 <sup>d</sup> Number of tubes with insufficient quantity for analysis per total number of specimens sent for hemoglobin (ethylenediaminetetraacetic acid [EDTA] tubes)  
125 and creatinine (lithium or sodium heparin tubes) tests during ICU admission; analyzed using Chi-Square test of equality of two proportions.

126 <sup>e</sup> Denominators for the small-volume tube group vs. standard-volume tube group were 231223 vs. 231451, respectively.

127 <sup>f</sup> Percent difference in % was presented for binary outcomes and was adjusted for age and sex and accounted for the stepped wedge design. Absolute percent  
128 difference in % without any adjustment was presented for specimens with insufficient quantity outcome.

129 <sup>g</sup> Analyses were adjusted for baseline admission hemoglobin in addition to adjusting for age and sex.

130 <sup>h</sup> Hemoglobin adjusted for RBC transfusion 1 transfusion = Hb – 1 g/dL. Values <0 were substituted with 0 (<5% of values).

131 <sup>i</sup> Denominators for the small-volume tube group vs. standard-volume tube group were 16412 vs. 17313, respectively.

132 <sup>j</sup> Unadjusted RR (95% CI) for Mortality in ICU and Mortality in hospital were 1.22 (1.15, 1.28) and 1.18 (1.12, 1.24), respectively.

133 <sup>k</sup> Denominators for the small-volume tube group vs. standard-volume tube group were 12806 vs. 13400, respectively.

134  
135  
136  
137

138 **eTable 7: Study outcomes among patients with any duration of ICU admission (including patients admitted during pandemic-**  
 139 **related delay)**  
 140

| Outcome                                                                                                        |                 | Population with any duration of ICU admission <sup>a</sup> , n=50,485 |                                    |                                        |                                  |
|----------------------------------------------------------------------------------------------------------------|-----------------|-----------------------------------------------------------------------|------------------------------------|----------------------------------------|----------------------------------|
|                                                                                                                |                 | Small-Volume Tubes,<br>n=27,294                                       | Standard-Volume Tubes,<br>n=23,191 | RR <sup>b</sup> (95% CI)               | MD <sup>b</sup> (95% CI)         |
| <b>Primary outcome</b>                                                                                         |                 |                                                                       |                                    |                                        |                                  |
| RBC units transfused in ICU per patient per 4 days in ICU (median in primary analysis)                         | LSM (95% CI)    | 0.76 (0.56, 1.02)                                                     | 0.80 (0.60, 1.08)                  | 0.94 (0.82, 1.09), p=0.43 <sup>c</sup> | -0.05 (-0.17, 0.06)              |
|                                                                                                                | Crude mean (SD) | 0.84 (3.83)                                                           | 0.83 (3.99)                        |                                        |                                  |
| <b>Secondary outcomes</b>                                                                                      |                 |                                                                       |                                    |                                        |                                  |
| Specimens with insufficient quantity for analysis <sup>d,e</sup>                                               | No. (%)         | 90 (0.026)                                                            | 84 (0.032)                         |                                        | -0.03 (-0.14, 0.07) <sup>f</sup> |
| Patients received ≥ 1 units RBC transfusion in ICU                                                             | No. (%)         | 5471 (20.0)                                                           | 4717 (20.3)                        | 0.95 (0.89, 1.02)                      | -0.99 (-2.40, 0.32) <sup>f</sup> |
| Change in hemoglobin from ICU admission to ICU discharge adjusted for RBC transfusions <sup>g,h,i</sup> , g/dL | Median (IQR)    | -0.90 (-2.20, 0.00)                                                   | -0.90 (-2.30, 0.00)                |                                        | 0.13 (0.05, 0.21)                |
| Duration of ICU admission, days                                                                                | Median (IQR)    | 2.0 (1.0, 5.0)                                                        | 2.0 (1.0, 5.0)                     | 0.96 (0.93, 1.00)                      | -0.17 (-0.34, -0.01)             |
| Duration of hospital admission, days                                                                           | Median (IQR)    | 7.0 (5.0, 13.0)                                                       | 7.0 (5.0, 13.0)                    | 1.00 (0.97, 1.02)                      | -0.02 (-0.28, 0.23)              |
| Mortality in ICU                                                                                               | No. (%)         | 3532 (12.9)                                                           | 2560 (11.0)                        | 0.96 (0.89, 1.04) <sup>j</sup>         | -0.59 (-1.78, 0.51) <sup>f</sup> |
| Mortality in hospital                                                                                          | No. (%)         | 4163 (15.3)                                                           | 3139 (13.5)                        | 0.95 (0.89, 1.02) <sup>j</sup>         | -0.78 (-2.02, 0.38) <sup>f</sup> |

| Outcome                                                                                                             | Population with any duration of ICU admission <sup>a</sup> , n=50,485 |                                    |                          |                          |                     |
|---------------------------------------------------------------------------------------------------------------------|-----------------------------------------------------------------------|------------------------------------|--------------------------|--------------------------|---------------------|
|                                                                                                                     | Small-Volume Tubes,<br>n=27,294                                       | Standard-Volume Tubes,<br>n=23,191 | RR <sup>b</sup> (95% CI) | MD <sup>b</sup> (95% CI) |                     |
| <b>Post-hoc exploratory outcomes</b>                                                                                |                                                                       |                                    |                          |                          |                     |
| Hemoglobin within 48hrs of ICU discharge <sup>g,i</sup> , g/dL                                                      | Median (IQR)                                                          | 10.00 (8.60, 11.70)                | 10.00 (8.60, 11.70)      | 1.01 (1.00, 1.01)        | 0.08 (0.02, 0.14)   |
| Change in hemoglobin from ICU admission to ICU discharge <sup>g,i</sup> , g/dL                                      | Median (IQR)                                                          | -0.50 (-1.50, 0.00)                | -0.60 (-1.60, 0.00)      |                          | 0.08 (0.02, 0.13)   |
| Change in hemoglobin from ICU admission to ICU discharge in patients without RBC transfusions <sup>g,k</sup> , g/dL | Median (IQR)                                                          | -0.50 (-1.40, 0.00)                | -0.60 (-1.50, 0.00)      |                          | 0.05 (-0.003, 0.10) |

141

142 CI, confidence interval; ICU, intensive care unit; IQR, interquartile range; LSM, least squares mean; MD, mean difference; RBC, red blood cell; RR, relative risk;  
 143 SD, standard deviation.

144 <sup>a</sup> Patients admitted during pandemic-related delay in transitions to small-volume tubes (March 2, 2020 - August 17, 2020) were included.

145 <sup>b</sup> Relative Risk and Mean Difference were adjusted for age and sex and accounted for the stepped wedge design with periods modelled as fixed effects,  
 146 ICU units as a random effect, and length of ICU stay as an offset.

147 <sup>c</sup> P value represents the result of the hypothesis test for the significance of the intervention (transition to small-volume tubes) effect and was calculated by  
 148 generalized linear mixed model adjusted for age and sex and accounted for the stepped wedge design.

149 <sup>d</sup> Number of tubes with insufficient quantity for analysis per total number of specimens sent for hemoglobin (ethylenediaminetetraacetic acid [EDTA] tubes)  
 150 and creatinine (lithium or sodium heparin tubes) tests during ICU admission; analyzed using Chi-Square test of equality of two proportions.

151 <sup>e</sup> Denominators for the small-volume tube group vs. standard-volume tube group were 343458 vs. 263595, respectively.

152 <sup>f</sup> Percent difference in % was presented for binary outcomes and was adjusted for age and sex and accounted for the stepped wedge design. Absolute percent  
 153 difference in % without any adjustment was presented for specimens with insufficient quantity outcome.

154 <sup>g</sup> Analyses were adjusted for baseline admission hemoglobin in addition to adjusting for age and sex.

155 <sup>h</sup> Hemoglobin adjusted for RBC transfusion 1 transfusion = Hb – 1 g/dL. Values <0 were substituted with 0 (<5% of values).

156 <sup>i</sup> Denominators for the small-volume tube group vs. standard-volume tube group were 23726 vs. 19900, respectively.

157 <sup>j</sup> Unadjusted RR (95% CI) for Mortality in ICU and Mortality in hospital were 1.17 (1.12, 1.23) and 1.13 (1.08, 1.18), respectively.

158 <sup>k</sup> Denominators for the small-volume tube group vs. standard-volume tube group were 18520 vs. 15500, respectively.

159

160

161

162 **eTable 8: Subgroup analyses for the effect of transition to small-volume tubes on RBC units transfused in ICU (primary**  
 163 **population)**  
 164

| Outcome                                                     | Primary population <sup>a</sup> , n=21,201 |                     |                                              |                                                 |                          |                          |                   |                   |
|-------------------------------------------------------------|--------------------------------------------|---------------------|----------------------------------------------|-------------------------------------------------|--------------------------|--------------------------|-------------------|-------------------|
|                                                             | Subgroup                                   | No. (%) of patients | Small-Volume Tubes, n=10,261<br>LSM (95% CI) | Standard-Volume Tubes, n=10,940<br>LSM (95% CI) | RR <sup>b</sup> (95% CI) | MD <sup>b</sup> (95% CI) | P                 | P for interaction |
| <b>Primary outcome</b>                                      |                                            |                     |                                              |                                                 |                          |                          |                   |                   |
| RBC units transfused in ICU per patient per median ICU stay | Overall                                    | 21201               | 0.72 (0.52, 0.98) <sup>c</sup>               | 0.79 (0.58, 1.07) <sup>c</sup>                  | 0.91 (0.79, 1.05)        | -0.07 (-0.19, 0.03)      | 0.19 <sup>d</sup> |                   |
|                                                             | Age, years                                 | 21201               |                                              |                                                 |                          |                          |                   | 0.91 <sup>e</sup> |
|                                                             | ≤65                                        | 10218 (48.2)        | 0.75 (0.55, 1.02) <sup>f</sup>               | 0.81 (0.60, 1.10) <sup>f</sup>                  | 0.93 (0.76, 1.13)        | -0.06 (-0.24, 0.09)      | 0.46 <sup>d</sup> |                   |
|                                                             | >65                                        | 10983 (51.8)        | 0.68 (0.49, 0.94) <sup>g</sup>               | 0.76 (0.55, 1.06) <sup>g</sup>                  | 0.89 (0.72, 1.09)        | -0.09 (-0.26, 0.05)      | 0.25 <sup>d</sup> |                   |
|                                                             | Sex                                        | 21171               |                                              |                                                 |                          |                          |                   | 0.09 <sup>e</sup> |
|                                                             | Female                                     | 8268 (39.1)         | 0.72 (0.52, 1.00) <sup>h</sup>               | 0.68 (0.49, 0.94) <sup>h</sup>                  | 1.06 (0.86, 1.31)        | 0.04 (-0.12, 0.17)       | 0.61 <sup>d</sup> |                   |
|                                                             | Male                                       | 12903 (61.0)        | 0.74 (0.54, 1.01) <sup>i</sup>               | 0.88 (0.64, 1.20) <sup>i</sup>                  | 0.84 (0.69, 1.01)        | -0.14 (-0.33, 0.01)      | 0.06 <sup>d</sup> |                   |
|                                                             | Initial hemoglobin, g/dL                   | 19981               |                                              |                                                 |                          |                          |                   | 0.19 <sup>e</sup> |
|                                                             | ≤10.9                                      | 10255 (51.3)        | 1.15 (0.90, 1.49) <sup>j</sup>               | 1.26 (0.98, 1.62) <sup>j</sup>                  | 0.92 (0.78, 1.07)        | -0.11 (-0.32, 0.08)      | 0.27 <sup>d</sup> |                   |
|                                                             | >10.9                                      | 9726 (48.7)         | 0.27 (0.16, 0.43) <sup>k</sup>               | 0.33 (0.20, 0.53) <sup>k</sup>                  | 0.81 (0.59, 1.12)        | -0.06 (-0.18, 0.03)      | 0.21 <sup>d</sup> |                   |

165 CI, confidence interval; ICU, intensive care unit; LSM, least squares mean; MD, mean difference; RBC, red blood cell; RR, relative risk.

166 <sup>a</sup>Patients admitted during pandemic-related delay in transitions to small-volume tubes (March 2, 2020 - August 17, 2020) were excluded.

167 <sup>b</sup>Relative Risk/Mean Difference results were adjusted for age and sex (if not a subgroup analysis by sex) and accounted for the stepped wedge design with  
 168 periods modelled as fixed effects, ICU units as a random effect, and length of ICU stay as an offset.

169 <sup>c</sup>Denominators for the small-volume tube group vs. standard-volume tube group are 10260 vs. 10911, respectively.



170 <sup>d</sup>P value represents the result of the hypothesis test for the significance of the intervention (transition to small-volume tubes) effect and was calculated by  
171 generalized linear mixed model adjusted for age and sex (if not a subgroup analysis by sex) and accounted for the stepped wedge design with periods  
172 modelled as fixed effects, ICU units as a random effect, and length of ICU stay as an offset.

173 <sup>e</sup>P value represents the result of the hypothesis test for the significance of the interaction between intervention (transition to small-volume tubes) and  
174 subgroup allocation and was calculated by generalized linear mixed model adjusted for age and sex (if not a subgroup analysis by sex) and accounted for the  
175 stepped wedge design with periods modelled as fixed effects, ICU units as a random effect, and length of ICU stay as an offset.

176 <sup>f</sup>Denominators for the small-volume tube group vs. standard-volume tube group are 4920 vs. 5282, respectively.

177 <sup>g</sup>Denominators for the small-volume tube group vs. standard-volume tube group are 5340 vs. 5629, respectively.

178 <sup>h</sup>Denominators for the small-volume tube group vs. standard-volume tube group are 4090 vs. 4178, respectively.

179 <sup>i</sup>Denominators for the small-volume tube group vs. standard-volume tube group are 6170 vs. 6733, respectively.

180 <sup>j</sup>Denominators for the small-volume tube group vs. standard-volume tube group are 5111 vs. 5129, respectively.

181 <sup>k</sup>Denominators for the small-volume tube group vs. standard-volume tube group are 4594 vs. 5118, respectively.

182  
183  
184  
185  
186  
187  
188  
189  
190  
191  
192  
193  
194  
195  
196  
197  
198  
199  
200  
201  
202  
203  
204  
205

206  
207

**eTable 9: Subgroup analysis for the effect of intervention on RBC units transfused on ICU (secondary population)**

| Outcome                                                     | Secondary population <sup>a</sup> , n=27,411 |                                |                                              |                                                 |                          |                          |                   |                   |
|-------------------------------------------------------------|----------------------------------------------|--------------------------------|----------------------------------------------|-------------------------------------------------|--------------------------|--------------------------|-------------------|-------------------|
|                                                             | Subgroup                                     | No. (%) of patients            | Small-Volume Tubes, n=14,708<br>LSM (95% CI) | Standard-Volume Tubes, n=12,703<br>LSM (95% CI) | RR <sup>b</sup> (95% CI) | MD <sup>b</sup> (95% CI) | P                 | P for interaction |
| <b>Primary outcome</b>                                      |                                              |                                |                                              |                                                 |                          |                          |                   |                   |
| RBC units transfused in ICU per patient per median ICU stay | Overall                                      | 27411                          | 0.71 (0.53, 0.93) <sup>c</sup>               | 0.80 (0.61, 1.06) <sup>c</sup>                  | 0.88 (0.77, 1.00)        | -0.10 (-0.21, -0.002)    | 0.04 <sup>d</sup> |                   |
|                                                             | Age, years                                   | 27411                          |                                              |                                                 |                          |                          |                   | 0.49 <sup>e</sup> |
|                                                             | ≤65                                          | 13368 (48.8)                   | 0.73 (0.56, 0.97) <sup>f</sup>               | 0.83 (0.63, 1.09) <sup>f</sup>                  | 0.89 (0.75, 1.06)        | -0.09 (-0.25, 0.04)      | 0.19 <sup>d</sup> |                   |
|                                                             | >65                                          | 14043 (51.2)                   | 0.68 (0.50, 0.91) <sup>g</sup>               | 0.77 (0.58, 1.04) <sup>g</sup>                  | 0.87 (0.73, 1.05)        | -0.10 (-0.25, 0.03)      | 0.14 <sup>d</sup> |                   |
|                                                             | Sex                                          | 27331                          |                                              |                                                 |                          |                          |                   | 0.09 <sup>e</sup> |
|                                                             | Female                                       | 10636 (38.9)                   | 0.71 (0.53, 0.94) <sup>h</sup>               | 0.73 (0.55, 0.96) <sup>h</sup>                  | 0.97 (0.81, 1.17)        | -0.02 (-0.17, 0.10)      | 0.76 <sup>d</sup> |                   |
|                                                             | Male                                         | 16695 (61.1)                   | 0.72 (0.54, 0.97) <sup>i</sup>               | 0.86 (0.65, 1.15) <sup>i</sup>                  | 0.84 (0.71, 0.99)        | -0.14 (-0.29, -0.004)    | 0.04 <sup>d</sup> |                   |
|                                                             | Initial hemoglobin, g/dL                     | 25831                          |                                              |                                                 |                          |                          |                   | 0.03 <sup>e</sup> |
|                                                             | ≤10.9                                        | 13073 (50.6)                   | 1.15 (0.92, 1.45) <sup>j</sup>               | 1.27 (1.01, 1.60) <sup>j</sup>                  | 0.91 (0.79, 1.04)        | -0.12 (-0.31, 0.05)      | 0.17 <sup>d</sup> |                   |
| >10.9                                                       | 12758 (49.4)                                 | 0.26 (0.17, 0.40) <sup>k</sup> | 0.34 (0.22, 0.52) <sup>k</sup>               | 0.77 (0.58, 1.03)                               | -0.08 (-0.19, 0.01)      | 0.08 <sup>d</sup>        |                   |                   |

208 CI, confidence interval; ICU, intensive care unit; LSM, least squares mean; MD, mean difference; RBC, red blood cell; RR, relative risk.

209 <sup>a</sup>Patients admitted during pandemic-related delay in transitions to small-volume tubes (March 2, 2020 - August 17, 2020) were included.

210 <sup>b</sup>Relative Risk/Mean Difference results were adjusted for age and sex (if not a subgroup analysis by sex) and accounted for the stepped wedge design with periods modelled as fixed effects, ICU units as a random effect, and length of ICU stay as an offset.

211 <sup>c</sup>Denominators for the small-volume tube group vs. standard-volume tube group are 14706 vs. 12625, respectively.

212 <sup>d</sup>P value represents the result of the hypothesis test for the significance of the intervention (transition to small-volume tubes) effect and was calculated by generalized linear mixed model adjusted for age and sex (if not a subgroup analysis by sex) and accounted for the stepped wedge design with periods modelled as fixed effects, ICU units as a random effect, and length of ICU stay as an offset.

216 <sup>e</sup>P value represents the result of the hypothesis test for the significance of the interaction between intervention (transition to small-volume tubes) and  
217 subgroup allocation and was calculated by generalized linear mixed model adjusted for age and sex (if not a subgroup analysis by sex) and accounted for the  
218 stepped wedge design with periods modelled as fixed effects, ICU units as a random effect, and length of ICU stay as an offset.

219 <sup>f</sup>Denominators for the small-volume tube group vs. standard-volume tube group are 7116 vs. 6208, respectively.

220 <sup>g</sup>Denominators for the small-volume tube group vs. standard-volume tube group are 7590 vs. 6417, respectively.

221 <sup>h</sup>Denominators for the small-volume tube group vs. standard-volume tube group are 5804 vs. 4832, respectively.

222 <sup>i</sup>Denominators for the small-volume tube group vs. standard-volume tube group are 8902 vs. 7793, respectively.

223 <sup>j</sup>Denominators for the small-volume tube group vs. standard-volume tube group are 7218 vs. 5822, respectively.

224 <sup>k</sup>Denominators for the small-volume tube group vs. standard-volume tube group are 6593 vs. 6122, respectively.

225

226

227

228

229

230

231

232

233

234

235

236

237

238

239

240

241

242

243

244

245

246

247

248

249

250 **eTable 10: Sensitivity analysis of primary outcome adjusted for imbalanced baseline characteristics (primary population)**

251

| Outcome                                                                                                                                  |                 | Primary population with imbalanced baseline characteristics available <sup>a</sup> , n=15,725 |                                   |                          |                          |                   |
|------------------------------------------------------------------------------------------------------------------------------------------|-----------------|-----------------------------------------------------------------------------------------------|-----------------------------------|--------------------------|--------------------------|-------------------|
|                                                                                                                                          |                 | Small-Volume Tubes,<br>n=7,912                                                                | Standard-Volume Tubes,<br>n=7,813 | RR <sup>b</sup> (95% CI) | MD <sup>b</sup> (95% CI) | P                 |
| <b>Primary outcome</b>                                                                                                                   |                 |                                                                                               |                                   |                          |                          |                   |
| RBC units transfused in ICU per patient per median ICU stay, adjusted for age and sex only                                               | LSM (95% CI)    | 0.79 (0.56, 1.10) <sup>c</sup>                                                                | 0.92 (0.65, 1.29) <sup>c</sup>    | 0.86 (0.73, 1.01)        | -0.13 (-0.29, 0.004)     | 0.06 <sup>d</sup> |
|                                                                                                                                          | Crude mean (SD) | 0.85 (2.35)                                                                                   | 1.05 (3.14)                       |                          |                          |                   |
| RBC units transfused in ICU per patient per median ICU stay, adjusted for age, sex, and imbalanced baseline characteristics <sup>a</sup> | LSM (95% CI)    | 0.83 (0.59, 1.17) <sup>c</sup>                                                                | 0.96 (0.68, 1.36) <sup>c</sup>    | 0.86 (0.74, 1.01)        | -0.13 (-0.30, 0.01)      | 0.07 <sup>d</sup> |
|                                                                                                                                          | Crude mean (SD) | 0.85 (2.35)                                                                                   | 1.05 (3.14)                       |                          |                          |                   |

252

CI, confidence interval; ICU, intensive care unit; LSM, least squares mean; MD, mean difference; RBC, red blood cell; RR, relative risk; SD, standard deviation.

253

<sup>a</sup>Patients admitted during pandemic-related delay in transitions to small-volume tubes (March 2, 2020 - August 17, 2020) were excluded. Data was provided by 19/25 sites. Baseline characteristics with standardized difference >0.1 between patients in small-volume and standard-volume groups were considered imbalanced. For primary population, this variable is injury diagnosis only.

255

<sup>b</sup>Relative Risk/Mean Difference results were adjusted for age and sex and accounted for the stepped wedge design with periods modelled as fixed effects, ICU units as a random effect, and length of ICU stay as an offset.

256

<sup>c</sup>Denominators for the small-volume tube group vs. standard-volume tube group are 7912 vs. 7813, respectively.

257

<sup>d</sup>P value represents the result of the hypothesis test for the significance of the intervention (transition to small-volume tubes) effect and was calculated by generalized linear mixed model adjusted for age and sex and accounted for the stepped wedge design with periods modelled as fixed effects, ICU units as a random effect, and length of ICU stay as an offset.

261

262

263

264

265

266

267

268

269

270

271

272 **eTable 11: Sensitivity analysis of primary outcome without adjusting for age and sex, and primary outcome model with time-**  
 273 **decay correlation**  
 274

| Analysis                                                    | RBC units transfused in ICU per patient per median ICU stay | Primary population <sup>a</sup> , n=21,201 |                                 |                          |                          |                   |
|-------------------------------------------------------------|-------------------------------------------------------------|--------------------------------------------|---------------------------------|--------------------------|--------------------------|-------------------|
|                                                             |                                                             | Small-Volume Tubes, n=10,261               | Standard-Volume Tubes, n=10,940 | RR <sup>b</sup> (95% CI) | MD <sup>b</sup> (95% CI) | P                 |
| Adjustment for age and sex (a priori)                       | LSM (95% CI)                                                | 0.72 (0.52, 0.98) <sup>c</sup>             | 0.79 (0.58, 1.07) <sup>c</sup>  | 0.91 (0.79, 1.05)        | -0.07 (-0.19, 0.03)      | 0.19 <sup>d</sup> |
|                                                             | Crude mean (SD)                                             | 0.78 (2.23)                                | 0.88 (2.79)                     |                          |                          |                   |
| No adjustment for age and sex                               | LSM (95% CI)                                                | 0.73 (0.53, 0.99) <sup>e</sup>             | 0.80 (0.59, 1.09) <sup>e</sup>  | 0.90 (0.78, 1.04)        | -0.08 (-0.20, 0.03)      | 0.17 <sup>d</sup> |
|                                                             | Crude mean (SD)                                             | 0.78 (2.23)                                | 0.88 (2.79)                     |                          |                          |                   |
| Analysis with time-decay correlation structure <sup>f</sup> | LSM (95% CI)                                                | 0.72 (0.52, 0.98) <sup>c</sup>             | 0.79 (0.58, 1.07) <sup>c</sup>  | 0.91 (0.79, 1.05)        | -0.07 (-0.19, 0.03)      | 0.19 <sup>d</sup> |
|                                                             | Crude mean (SD)                                             | 0.78 (2.23)                                | 0.88 (2.79)                     |                          |                          |                   |

275 CI, confidence interval; ICU, intensive care unit; IQR, interquartile range; LSM, least squares mean; MD, mean difference; RBC, red blood cell; RR, relative risk;  
 276 SD, standard deviation.

277 <sup>a</sup> Patients admitted during pandemic-related delay in transitions to small-volume tubes (March 2, 2020 - August 17, 2020) were excluded.

278 <sup>b</sup> Relative Risk/Mean Difference results were accounted for the stepped wedge design with periods modelled as fixed effects, ICU units as a random effect,  
 279 and length of ICU stay as an offset.

280 <sup>c</sup> Denominators for the small-volume tube group vs. standard-volume tube group are 10260 vs. 10911, respectively.

281 <sup>d</sup> P value represents the result of the hypothesis test for the significance of the intervention (transition to small-volume tubes) effect and was calculated by  
 282 generalized linear mixed model adjusted for age and sex and accounted for the stepped wedge design with periods modelled as fixed effects, ICU units as a  
 283 random effect, and length of ICU stay as an offset.

284 <sup>e</sup> Denominators for the small-volume tube group vs. standard-volume tube group are 10261 vs. 10940, respectively.

285 <sup>f</sup> To examine the issue of potential correlation misspecification, we conducted a post-hoc analysis using time-decay correlation structure. The observed  
 286 cluster autocorrelation (CAC) was 0.95 close to 1 used in the power calculation.  
 287

288 **eTable 12: Analysis of primary outcome using pre-specified generalized linear mixed model (GLMM) and post-hoc generalised**  
289 **estimating equation model (GEE)**  
290

| <b>RBC units transfused in ICU per patient per median ICU stay</b> | <b>RR (95% CI)</b> | <b>MD (95% CI)</b>  | <b>P-value</b> |
|--------------------------------------------------------------------|--------------------|---------------------|----------------|
| GLMM Model                                                         | 0.91 (0.79, 1.05)  | -0.07 (-0.19, 0.03) | 0.19           |
| GEE Model                                                          | 0.91 (0.60, 1.37)  | -0.08 (-0.51, 0.21) | 0.63           |

291 CI, confidence interval; GEE, generalized estimating equation; GLMM, generalised linear mixed model; ICU, intensive care unit; MD, mean difference; RBC, red  
292 blood cell; RR, relative risk.  
293  
294  
295  
296  
297
