# Supplementary material
Source: PubMed Central journal article supplement (PMC10570918)
Supplement: jama-e2320820-s003.pdf [file jama-e2320820-s003.pdf]

## **Data Sharing Statement**

Siegal. Small-Volume Blood Collection Tubes to Reduce Transfusions in Intensive Care. *JAMA*. Published October 12, 2023. doi:10.1001/jama.2023.20820

### **Data**

**Data available:** No
